# Supplementary material
Source: publisher site journal article supplement (https://www.spandidos-publications.com/254/downloadSupplementary)
Supplement: Supplementary file 1 [file downloadSupplementary]

Figure S1. The H&E stain of mouse liver tissue. After euthanization, the livers were harvested for H&E staining and examined by light microscopy at magnifications of (A) x100, (B) x200 and (C) x400. Arrowheads, normal hepatocytes (black) and patent sinusoidal capillary space (white); Arrow, swollen hepatocytes with narrowed sinusoidal capillary spaces.

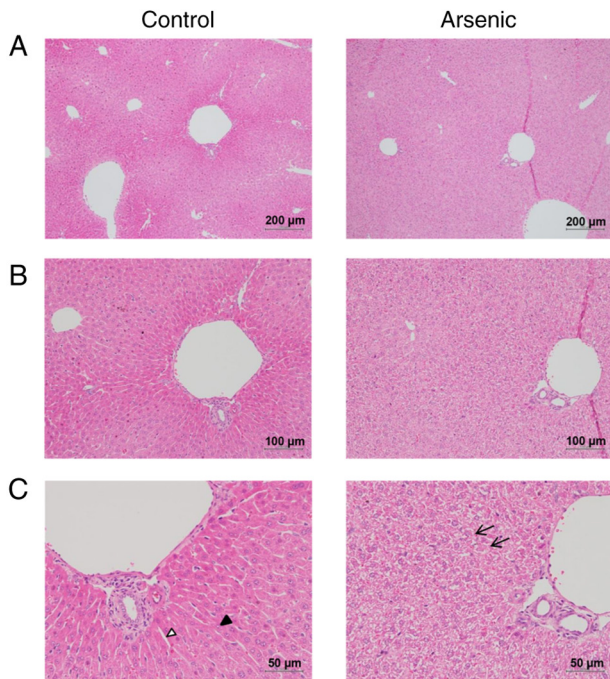

Figure S2. The putative CpG island location of mouse *Cbs*, *Malat1*, *Adora1* and *Wif1* genes. The CpG island was predicted by EMBOSS CpGplot ([https://www.ebi.ac.uk/Tools/seqstats/emboss\\_cpgplot/](https://www.ebi.ac.uk/Tools/seqstats/emboss_cpgplot/)). The 500-bp sequence region before and after transcription start site (TSS) (-500 to +500 bp) of *Cbs*, *Adora1* and *Wif1* were assayed, and the -250 to +100 bp region of *Malat1* was analyzed. The putative CpG island was indicated by 2 lines in the lower image of each gene. *Cbs*, cystathionine  $\beta$ -synthase; *Adora1*, adenosine A1 receptor; *Wif1*, Wnt inhibitory factor 1; *Malat1*, metastasis-associated lung adenocarcinoma transcript 1; *WIF1*, Wnt inhibitory factor 1.

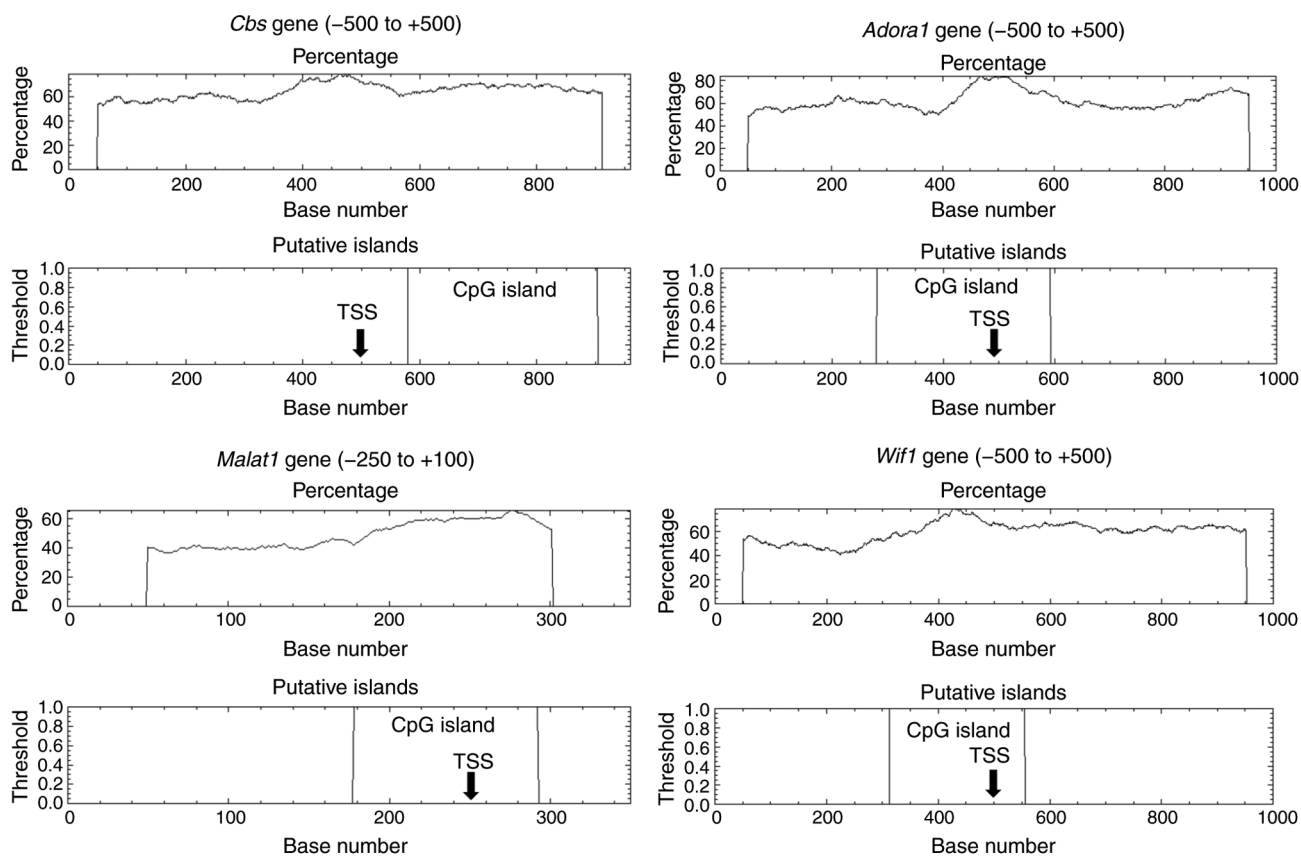

Figure S3. The result of OncoPrint database (<http://www.oncoPrint.org>) search of the *WIFI* gene. Primary filters: differential analysis and bladder cancer. Threshold by: P-value ( $1E-4$ ), fold change (1.5) and gene rank (all). The differential analysis result is from Sanchez-Carbayo Bladder 2, fold change=2.462,  $P=7.64E-5$ . *WIFI*, Wnt inhibitory factor 1.

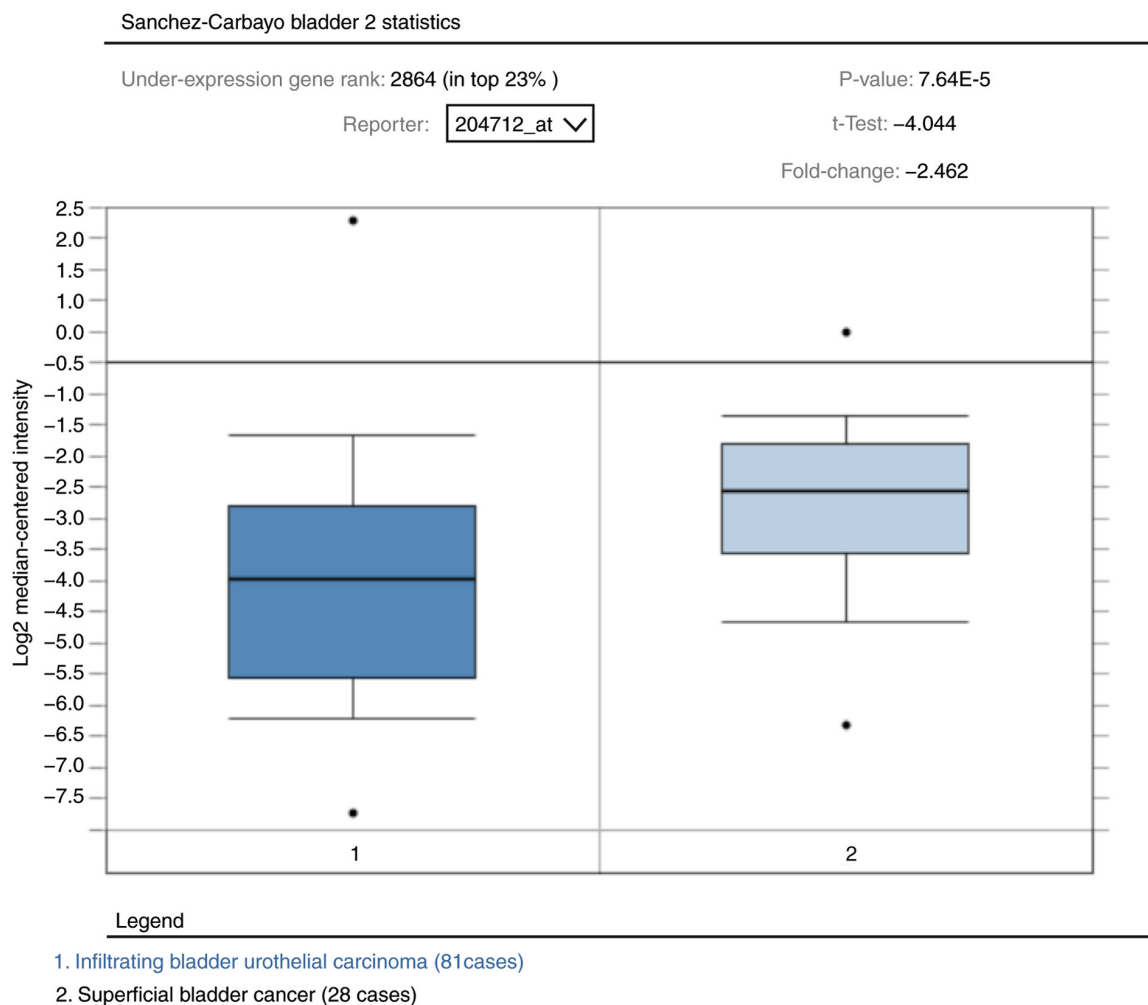

Table SI. Normalized intensities of upregulated genes and downregulated genes in control and arsenic-treated mouse bladder from DNA microarray chip analysis.

A, Upregulated genes

| Normalized intensity |             | Log <sub>2</sub> (ratio)<br>A/C | P-value (differentially expressed)<br>A/C | Annotation        |                   |
|----------------------|-------------|---------------------------------|-------------------------------------------|-------------------|-------------------|
| Control (C)          | Arsenic (A) |                                 |                                           | Gene_symbol       | Entrez_gene       |
| 153.485535           | 1036.77869  | 2.746921                        | 5.74949E-14                               | Rnu11             | 353373            |
| 395.941101           | 2607.92529  | 2.646373                        | 1.65899E-18                               | Rn7sk             | 19817             |
| 359.535034           | 1817.66797  | 2.265185                        | 2.34224E-06                               | Fosb              | 14282             |
| 34.984741            | 126.803871  | 2.16917                         | 0.006034087                               | Rnu12             | 104307            |
| 3769.73877           | 17352.2539  | 2.097754                        | 4.30274E-16                               | Fos               | 14281             |
| 15.989611            | 22.479181   | 1.947264                        | 0.044331357                               | Gm10743           | 100038546         |
| 42.509399            | 129.80954   | 1.878069                        | 0.003601267                               | Ibsp              | 15891             |
| 936.258789           | 3540.99121  | 1.822469                        | 6.26443E-12                               | Rnu2-10           | 19848             |
| 38.520142            | 107.812469  | 1.798473                        | 0.010967372                               | Mmp10             | 17384             |
| 485.036041           | 1329.93628  | 1.373896                        | 7.68319E-07                               | Tcap              | 21393             |
| 1129.51733           | 3140.69141  | 1.363321                        | 1.16534E-05                               | Socs3             | 12702             |
| 8192.96875           | 21538.9609  | 1.295025                        | 2.08289E-08                               | Ttr               | 22139             |
| 201.459778           | 490.625916  | 1.272628                        | 0.00058669                                | Mybpc1            | 109272            |
| 1396.37097           | 3719.51392  | 1.212231                        | 0.037542097                               | Clec4e            | 56619             |
| 91.494553            | 192.407654  | 1.191006                        | 0.005159843                               | Dhrs7c            | 68460             |
| 86.921112            | 94.882675   | 1.187354                        | 0.027968194                               | NA                | NA                |
| 8121.84766           | 19472.3359  | 1.164074                        | 2.40878E-09                               | Egr1              | 13653             |
| 2255.12646           | 5376.09668  | 1.149773                        | 3.52351E-06                               | Zfp36             | 22695             |
| 119.538826           | 251.563416  | 1.147271                        | 0.006744966                               | Cbs               | 12411             |
| 3981.85132           | 9069.32812  | 1.064651                        | 0.002077494                               | Malat1            | 72289             |
| 185.605942           | 371.309631  | 1.012777                        | 0.007683907                               | Scarna17          | 100217466         |
| 3973.00098           | 8301.45703  | 0.960877                        | 1.45229E-06                               | Junb              | 16477             |
| 602.702759           | 1228.66467  | 0.942128                        | 0.001716867                               | Klf15             | 66277             |
| 439.072693           | 874.21521   | 0.926631                        | 7.29423E-05                               | Plk5              | 216166            |
| 3180.61206           | 6389.47363  | 0.903116                        | 2.22309E-05                               | Adamts1           | 11504             |
| 303.794067           | 579.398682  | 0.897292                        | 0.022352822                               | Cebpd             | 12609             |
| 128.041794           | 225.209045  | 0.889885                        | 0.034369335                               | Tat               | 234724            |
| 920.280029           | 1809.25562  | 0.871417                        | 0.002074455                               | Adamdec1          | 58860             |
| 556.703735           | 1070.8042   | 0.86606                         | 0.000579368                               | Clec2d            | 93694             |
| 3075.29004           | 6080.85107  | 0.863064                        | 0.001731373                               | Rbp4              | 19662             |
| 5333.5625            | 10411.2383  | 0.861113                        | 8.13888E-06                               | Junb              | 16477             |
| 1247.68225           | 2434.2688   | 0.859713                        | 0.027991001                               | Dgkg              | 110197            |
| 393.498047           | 738.08606   | 0.845484                        | 0.001502705                               | Fetub             | 59083             |
| 398.585083           | 771.472168  | 0.838087                        | 0.047943927                               | Arhgap33          | 233071            |
| 185.054337           | 326.266266  | 0.835007                        | 0.021149697                               | Usp2              | 53376             |
| 393.606628           | 722.708008  | 0.815195                        | 0.004435451                               | Slitrk6           | 239250            |
| 144.506973           | 242.022766  | 0.798585                        | 0.023139855                               | Sprr2g            | 20761             |
| 156.950317           | 261.537842  | 0.7792                          | 0.044738293                               | Pcdh9             | 211712            |
| 125.014549           | 201.293228  | 0.767894                        | 0.037883788                               | Txlnb             | 378431            |
| 356.037659           | 625.528931  | 0.764461                        | 0.001694825                               | Bend5             | 67621             |
| 468.554565           | 831.699219  | 0.758096                        | 0.001003372                               | Fkbp5             | 14229             |
| 9253.59375           | 16599.5508  | 0.744607                        | 1.55619E-05                               | Rbp4              | 19662             |
| 1084.28723           | 1940.88538  | 0.744371                        | 0.000749457                               | Serpina3n         | 20716             |
| 149.485413           | 241.368698  | 0.741597                        | 0.037141141                               | Rn45s             | 100861531         |
| 15192.4678           | 26981.7676  | 0.738061                        | 5.64203E-05                               | Id3 LOC101056296l | 159031 101056296l |
|                      |             |                                 |                                           | LOC101056300      | 101056300         |
| 294.576569           | 501.074707  | 0.735905                        | 0.012214851                               | Ndp               | 17986             |
| 697.555908           | 1227.27148  | 0.728774                        | 0.000442648                               | Actr3b            | 242894            |
| 180.470032           | 292.072662  | 0.720932                        | 0.036786776                               | Lin7a             | 108030            |
| 135.506714           | 212.83667   | 0.718884                        | 0.04100243                                | Serpina3m         | 20717             |
| 1370.76587           | 2409.66675  | 0.718413                        | 0.002684748                               | Cyt11             | 231162            |

Table SI. Continued.

## A, Upregulated genes

| Normalized intensity |             | Log <sub>2</sub> (ratio)<br>A/C | P-value (differentially expressed)<br>A/C | Annotation    |             |
|----------------------|-------------|---------------------------------|-------------------------------------------|---------------|-------------|
| Control (C)          | Arsenic (A) |                                 |                                           | Gene_symbol   | Entrez_gene |
| 4767.77344           | 8416.74512  | 0.717124                        | 2.76778E-05                               | Dusp1         | 19252       |
| 1243.83582           | 2167.35132  | 0.702907                        | 0.000929946                               | Mtfp1         | 67900       |
| 2486.36963           | 4334.47656  | 0.698241                        | 0.000212627                               | Snord13       | 100217422   |
| 275.52713            | 451.37262   | 0.690226                        | 0.01485487                                | Adora1        | 11539       |
| 57401.1836           | 99647.4219  | 0.686216                        | 0.000431261                               | Inmt          | 21743       |
| 2717.72095           | 4696.84912  | 0.685559                        | 0.000622338                               | Cxcl14        | 57266       |
| 220.066223           | 350.661285  | 0.677038                        | 0.0370434                                 | 2900060B14Rik | 68204       |
| 1475.69287           | 2520.45117  | 0.672433                        | 0.000223106                               | Adamdec1      | 58860       |
| 369.643951           | 609.668762  | 0.66952                         | 0.029570961                               | Ch25h         | 12642       |
| 238.017883           | 378.84552   | 0.666936                        | 0.0202254                                 | Fxyd2         | 11936       |
| 518.102173           | 865.545044  | 0.665476                        | 0.004683108                               | Abcb1a        | 18671       |
| 599.082886           | 1005.32996  | 0.665054                        | 0.003155256                               | Snord118      | 100216530   |
| 2007.12744           | 3441.54126  | 0.653193                        | 0.027642824                               | Gata2         | 14461       |
| 1011.32855           | 1695.54956  | 0.652501                        | 0.003362621                               | Trdn          | 76757       |
| 1006.87762           | 1687.66113  | 0.650644                        | 0.002822923                               | Rasgef1b      | 320292      |
| 410.022949           | 665.166748  | 0.637393                        | 0.012258762                               | Rasl10a       | 75668       |
| 1197.83667           | 1968.66663  | 0.619752                        | 0.004075403                               | Cldn1         | 12737       |
| 20457.5781           | 33419.6484  | 0.616783                        | 0.002667355                               | Akr1b8        | 14187       |
| 340.539917           | 534.311829  | 0.60876                         | 0.020731846                               | Zbtb16        | 235320      |
| 290.500427           | 449.109924  | 0.605549                        | 0.032752112                               | NA            | NA          |
| 3201.81982           | 5218.00098  | 0.599564                        | 0.001631009                               | St8sia6       | 241230      |
| 3507.01123           | 5693.85693  | 0.594263                        | 0.001465738                               | Ccl11         | 20292       |
| 341.534515           | 530.086914  | 0.593726                        | 0.020579733                               | Ebf1          | 13591       |
| 612.661987           | 977.324463  | 0.592875                        | 0.012493176                               | Sprr2f        | 20760       |
| 521.691895           | 822.505432  | 0.587228                        | 0.03414515                                | Pln           | 18821       |

## B, Downregulated genes

| Normalized intensity |             | Log <sub>2</sub> (ratio)<br>A/C | P-value (differentially expressed)<br>A/C | Annotation    |             |
|----------------------|-------------|---------------------------------|-------------------------------------------|---------------|-------------|
| Control (C)          | Arsenic (A) |                                 |                                           | Gene_symbol   | Entrez_gene |
| 1914.3877            | 36.155842   | -6.405718                       | 0.003595377                               | Gpr110        | 77596       |
| 30.509045            | 5.314735    | -3.715784                       | 0.048019603                               | NA            | NA          |
| 1699.06104           | 217.584259  | -2.998247                       | 1.23615E-21                               | Myh2          | 17882       |
| 728.994385           | 124.582718  | -2.524884                       | 1.03799E-12                               | Ankrd1        | 107765      |
| 629.964294           | 111.124405  | -2.460865                       | 1.20796E-07                               | Spp1          | 20750       |
| 351.458771           | 69.652855   | -2.202048                       | 2.00502E-06                               | NA            | NA          |
| 915.598022           | 231.089935  | -2.005796                       | 1.33911E-07                               | Myl7          | 17898       |
| 743.416016           | 220.025726  | -1.861317                       | 0.009790109                               | Cxcl9         | 17329       |
| 63.191933            | 20.081207   | -1.672153                       | 0.040939804                               | 4930579G18Rik | 75913       |
| 31567.2363           | 10633.502   | -1.665745                       | 1.14711E-09                               | Myl4          | 17896       |
| 10237.5244           | 3756.19873  | -1.538292                       | 1.90209E-08                               | Npy6r         | 18169       |
| 16166.2754           | 6054.1499   | -1.516723                       | 4.35213E-10                               | Actc1         | 11464       |
| 573.962646           | 207.609863  | -1.481053                       | 2.02036E-06                               | Ptprz1        | 19283       |
| 1299.08484           | 495.281738  | -1.469969                       | 1.57932E-06                               | 4930550L24Rik | 75352       |
| 3797.87061           | 1525.40576  | -1.411951                       | 8.58834E-09                               | Msln          | 56047       |
| 299.49527            | 107.855942  | -1.395203                       | 6.49299E-05                               | Ccna2         | 12428       |
| 3935.02612           | 1613.60742  | -1.385206                       | 6.30632E-12                               | NA            | NA          |
| 3060.07617           | 1271.18164  | -1.363406                       | 3.58031E-11                               | Mfap4         | 76293       |
| 5628.4209            | 2354.21997  | -1.357813                       | 2.75966E-09                               | Aldh3a2       | 11671       |
| 3790.3772            | 1579.23804  | -1.357584                       | 4.29882E-09                               | Col8a2        | 329941      |

Table SI. Continued.

## B, Downregulated genes

| Normalized intensity |             | Log <sub>2</sub> (ratio)<br>A/C | P-value (differentially expressed)<br>A/C | Annotation           |              |
|----------------------|-------------|---------------------------------|-------------------------------------------|----------------------|--------------|
| Control (C)          | Arsenic (A) |                                 |                                           | Gene_symbol          | Entrez_gene  |
| 997.143433           | 412.210144  | -1.336443                       | 4.44963E-06                               | Itgbl1               | 223272       |
| 239.012482           | 88.688705   | -1.318805                       | 0.002132823                               | Lamc2                | 16782        |
| 119.495377           | 39.248451   | -1.282041                       | 0.021120226                               | Nkx2-1               | 21869        |
| 215.384171           | 81.546043   | -1.280585                       | 0.03067179                                | Cilp                 | 214425       |
| 767.031128           | 327.580261  | -1.253426                       | 0.005115786                               | Pilra                | 231805       |
| 354.064758           | 147.452209  | -1.228663                       | 0.000195902                               | Hcrtr1               | 230777       |
| 4011.35498           | 1854.1936   | -1.21401                        | 9.39427E-10                               | C1qtnf3              | 81799        |
| 222.764526           | 89.21138    | -1.192589                       | 0.038304966                               | Calm4                | 80796        |
| 274.744324           | 111.427765  | -1.192149                       | 0.010099172                               | Troap                | 78733        |
| 470.456848           | 207.042725  | -1.190463                       | 0.000182393                               | NA                   | NA           |
| 23861.4727           | 11405.7812  | -1.162101                       | 8.65714E-07                               | Ctgf                 | 14219        |
| 670.240112           | 308.020752  | -1.156681                       | 0.004795406                               | Rnf212               | 671564       |
| 475.491943           | 211.699493  | -1.151799                       | 0.032885071                               | Gm8140               | 666504       |
| 338.490967           | 151.154449  | -1.128236                       | 0.001012222                               | Nts                  | 67405        |
| 528.550903           | 246.292145  | -1.123275                       | 0.000305395                               | NA                   | NA           |
| 2565.49146           | 1268.26392  | -1.119616                       | 9.75541E-05                               | Tnnt3                | 21957        |
| 165.939728           | 68.694443   | -1.094632                       | 0.035931412                               | Slc26a3              | 13487        |
| 1190.12744           | 589.718994  | -1.09381                        | 1.51391E-05                               | Pck1                 | 18534        |
| 19350.2832           | 9785.77441  | -1.077605                       | 5.75037E-10                               | Ccnd1                | 12443        |
| 203.704224           | 88.166023   | -1.075845                       | 0.049914289                               | Trpm5                | 56843        |
| 794.238281           | 398.014709  | -1.050786                       | 0.001042764                               | Fgf9                 | 14180        |
| 513.080322           | 251.43103   | -1.050308                       | 0.000123996                               | Arc                  | 11838        |
| 1024.49487           | 546.424316  | -0.982049                       | 9.51398E-05                               | Clca2                | 80797        |
| 315.965881           | 156.122345  | -0.978843                       | 0.014549288                               | Kif26a               | 668303       |
| 548.983643           | 285.321289  | -0.97501                        | 0.000353746                               | Igj                  | 16069        |
| 18552.4316           | 10232.7598  | -0.953051                       | 2.8041E-07                                | Optc                 | 269120       |
| 2830.12695           | 1594.22388  | -0.927684                       | 8.6092E-07                                | Tgfb3                | 21809        |
| 853.44104            | 471.932068  | -0.925456                       | 0.000794824                               | Wif1                 | 24117        |
| 350.042908           | 182.692139  | -0.921286                       | 0.004668062                               | H60c                 | 670558       |
| 200.027618           | 98.228363   | -0.917324                       | 0.034402076                               | Fam150a              | 620393       |
| 208.02243            | 102.542191  | -0.916796                       | 0.0316476                                 | Med1                 | 19014        |
| 562.179504           | 311.587708  | -0.886199                       | 0.001602161                               | Cyp1a1               | 13076        |
| 837.630615           | 475.032471  | -0.883015                       | 0.010627735                               | Gm6557l2310042E22Rik | 625123166561 |
| 2518.53027           | 1464.32349  | -0.880711                       | 3.33803E-05                               | Bdh1                 | 71911        |
| 973.406494           | 566.50647   | -0.860589                       | 0.001162811                               | Pmaip1               | 58801        |
| 1110.69836           | 657.242432  | -0.839553                       | 0.000447285                               | Angptl7              | 654812       |
| 1083.0614            | 637.472412  | -0.839186                       | 0.016063986                               | Ush1c                | 72088        |
| 20711.6719           | 12566.5938  | -0.831693                       | 0.01297027                                | Gbp2                 | 14469        |
| 4639.85205           | 2817.79883  | -0.830224                       | 0.000419801                               | DOH4S114             | 27528        |
| 408.531067           | 231.046463  | -0.828766                       | 0.0150002                                 | Prss12               | 19142        |
| 1952.20349           | 1171.6217   | -0.826702                       | 0.034708113                               | Ly9                  | 17085        |
| 299.932831           | 165.530609  | -0.823636                       | 0.025340134                               | Cmah                 | 12763        |
| 532.572754           | 309.628387  | -0.816553                       | 0.002017579                               | Fmod                 | 14264        |
| 1209.2312            | 729.55127   | -0.814549                       | 0.000157314                               | Ern2                 | 26918        |
| 324.177917           | 180.82074   | -0.813161                       | 0.038676731                               | Pirt                 | 193003       |
| 810.423462           | 494.244141  | -0.804451                       | 0.023405904                               | NA                   | NA           |
| 23916.1992           | 14666.9004  | -0.797319                       | 1.1134E-06                                | Pi16                 | 74116        |
| 497.664032           | 291.549988  | -0.796916                       | 0.005954845                               | NA                   | NA           |
| 830.766174           | 501.860168  | -0.796409                       | 0.001313661                               | Wisp2                | 22403        |
| 2621.63135           | 1618.13965  | -0.795047                       | 5.3017E-05                                | Diras2               | 68203        |
| 14586.3652           | 9008.46875  | -0.794666                       | 6.44409E-05                               | Krt4                 | 16682        |
| 49674.9727           | 31111.9414  | -0.767447                       | 0.000537027                               | Ank1                 | 11733        |

Table SI. Continued.

## B, Downregulated genes

| Normalized intensity |             | Log <sub>2</sub> (ratio)<br>A/C | P-value (differentially expressed)<br>A/C | Annotation    |             |
|----------------------|-------------|---------------------------------|-------------------------------------------|---------------|-------------|
| Control (C)          | Arsenic (A) |                                 |                                           | Gene_symbol   | Entrez_gene |
| 899.308899           | 559.795654  | -0.758247                       | 0.007493428                               | Ms4a8a        | 64381       |
| 2783.21777           | 1779.79321  | -0.7459                         | 2.23722E-05                               | Tpm1          | 22003       |
| 2105.80371           | 1346.31824  | -0.743338                       | 0.000466877                               | Col3a1        | 12825       |
| 3427.62866           | 2200.94116  | -0.740452                       | 0.000356835                               | Cdk5r1        | 12569       |
| 2591.42407           | 1665.75195  | -0.73773                        | 6.92538E-05                               | Mmp17         | 23948       |
| 1991.34888           | 1275.42407  | -0.737293                       | 0.021628581                               | Cib3          | 234421      |
| 760.514282           | 480.38385   | -0.730935                       | 0.002586799                               | Il1r2         | 16178       |
| 1931.67139           | 1246.44849  | -0.728007                       | 0.006150825                               | Iga1          | 109700      |
| 1991.37683           | 1288.25427  | -0.725593                       | 0.000500811                               | 1500015O10Rik | 78896       |
| 767.487366           | 488.828857  | -0.723628                       | 0.039193843                               | Gnat1         | 14685       |
| 11536.957            | 7521.60449  | -0.718262                       | 8.17324E-05                               | Spon2         | 100689      |
| 489.009003           | 305.491394  | -0.708889                       | 0.020198081                               | Gbp1          | 14468       |
| 4831.72607           | 3244.00171  | -0.706416                       | 0.021084402                               | Jub           | 16475       |
| 547.146484           | 344.999695  | -0.705599                       | 0.010139853                               | Rspo1         | 192199      |
| 978.547852           | 635.856079  | -0.702984                       | 0.008429675                               | Cntnap2       | 66797       |
| 272.008026           | 162.697876  | -0.701483                       | 0.042324562                               | Folr1         | 14275       |
| 9966.65527           | 6586.2915   | -0.699184                       | 2.83333E-05                               | Cyp2e1        | 13106       |
| 1565.45117           | 1031.4292   | -0.695128                       | 0.003282167                               | Cck           | 12424       |
| 943.0224             | 616.209595  | -0.693895                       | 0.007732067                               | NA            | NA          |
| 7354.54736           | 4885.90967  | -0.689811                       | 0.00615911                                | Angptl4       | 57875       |
| 231.514984           | 137.912537  | -0.683121                       | 0.044621166                               | Vstm5         | 69137       |
| 333.966431           | 206.128754  | -0.683085                       | 0.032027572                               | Smpd3         | 58994       |
| 720.388184           | 468.84433   | -0.682884                       | 0.019377662                               | Rnd3          | 74194       |
| 1501.94885           | 997.877075  | -0.682236                       | 0.006110414                               | Dlk2          | 106565      |
| 739.831787           | 482.912262  | -0.680466                       | 0.012043689                               | Kcnf1         | 382571      |
| 17346.7969           | 11590.1182  | -0.677572                       | 7.10318E-05                               | Nr4a1         | 15370       |
| 449.515991           | 285.932861  | -0.675417                       | 0.033560619                               | NA            | NA          |
| 559.486633           | 362.204712  | -0.672117                       | 0.010414192                               | Gdf15         | 23886       |
| 1696.32703           | 1137.10266  | -0.671259                       | 0.000740886                               | Cnn1          | 12797       |
| 853.932861           | 566.940308  | -0.667129                       | 0.006158834                               | Kcnj15        | 16516       |
| 16119.7383           | 10902.0801  | -0.661791                       | 5.12121E-05                               | Sym           | 233335      |
| 37001.3125           | 24872.9023  | -0.657317                       | 0.001368895                               | Ogn           | 18295       |
| 2580.6333            | 1758.14868  | -0.654683                       | 0.001239567                               | S100a8        | 20201       |
| 7946.46777           | 5427.271    | -0.653866                       | 0.000202307                               | Sym           | 233335      |
| 12346.7451           | 8431.80371  | -0.650212                       | 0.000257113                               | Acta1         | 11459       |
| 603.607422           | 399.405945  | -0.648742                       | 0.008173375                               | Flrt1         | 396184      |
| 4090.82739           | 2803.98779  | -0.648551                       | 0.001530082                               | Amotl2        | 56332       |
| 3470.1062            | 2401.8584   | -0.646529                       | 0.040920261                               | Atg12         | 67526       |
| 2181.34131           | 1494.16846  | -0.644822                       | 0.00069364                                | Prss23        | 76453       |
| 1648.61646           | 1131.1377   | -0.638084                       | 0.002860422                               | Tnfrsf12a     | 27279       |
| 3036.94531           | 2099.7583   | -0.63414                        | 0.00632641                                | Ppp2r2b       | 72930       |
| 423.493469           | 276.304321  | -0.633701                       | 0.022227325                               | Cd3d          | 12500       |
| 560.432373           | 373.228394  | -0.633283                       | 0.034886446                               | Insc          | 233752      |
| 3394.40967           | 2354.09644  | -0.629854                       | 0.000452636                               | Gpm6a         | 234267      |
| 1413.7019            | 975.787292  | -0.629571                       | 0.029339576                               | Pgm5          | 226041      |
| 2680.83472           | 1860.85718  | -0.628052                       | 0.001128397                               | Fgf1          | 14164       |
| 16280.9141           | 11242.8457  | -0.627968                       | 0.001421577                               | Serpinf1      | 20317       |
| 2160.18311           | 1498.74902  | -0.627068                       | 0.005879942                               | Gls           | 14660       |
| 5660.77344           | 3974.41162  | -0.623978                       | 0.007879104                               | Eno3          | 13808       |
| 1961.66138           | 1361.27124  | -0.623905                       | 0.009681475                               | Dusp8         | 18218       |
| 900.958313           | 616.511963  | -0.622448                       | 0.018653993                               | Tnnc2         | 21925       |
| 3418.03809           | 2400.7168   | -0.616811                       | 0.02503904                                | Plekhh2       | 213556      |

Table SI. Continued.

## B, Downregulated genes

| Normalized intensity |             | Log <sub>2</sub> (ratio)<br>A/C | P-value (differentially expressed)<br>A/C | Annotation  |             |
|----------------------|-------------|---------------------------------|-------------------------------------------|-------------|-------------|
| Control (C)          | Arsenic (A) |                                 |                                           | Gene_symbol | Entrez_gene |
| 1257.48779           | 870.860718  | -0.616797                       | 0.007756962                               | Ncapd2      | 68298       |
| 5946.74121           | 4173.57471  | -0.615261                       | 0.001212917                               | Gm11627     | 100040792   |
| 1175.2085            | 815.627502  | -0.6141                         | 0.004568187                               | Ccbp2       | 59289       |
| 577.190796           | 390.736755  | -0.61207                        | 0.023669234                               | Ccl17       | 20295       |
| 5196.88184           | 3659.41553  | -0.610044                       | 0.00128898                                | Cfb         | 14962       |
| 387.503296           | 255.831818  | -0.60785                        | 0.048117422                               | Grip1       | 74053       |
| 1959.50305           | 1370.66968  | -0.607413                       | 0.010486256                               | Bcas1       | 76960       |
| 15384.9375           | 10849.7812  | -0.60444                        | 0.029953726                               | Flnc        | 68794       |
| 15080.3555           | 10613.5117  | -0.604429                       | 0.001522034                               | Adipoq      | 11450       |
| 24050.127            | 16882.2832  | -0.600867                       | 0.000330164                               | Cyp2f2      | 13107       |
| 6341.31738           | 4511.24902  | -0.59527                        | 0.000266698                               | Smoc2       | 64074       |
| 12860.1279           | 9114.61328  | -0.593077                       | 0.002557868                               | Dpt         | 56429       |
| 853.500732           | 598.479004  | -0.590876                       | 0.014802474                               | Lass3       | 545975      |
| 555.567993           | 381.806702  | -0.589164                       | 0.021848679                               | Wfdc10      | 629756      |
| 752.921387           | 524.380859  | -0.588112                       | 0.035533104                               | Frzb        | 20378       |

Table SII. Twelve enriched KEGG pathways identified following microarray analysis.

A, mmu04151:PI3K-Akt signaling pathway; Q-value: 4.666E-01

| Gene_<br>symbol | Description                                                                     | Entrez_<br>gene_id | log2 (ratio) | P-value<br>(differentially expressed) |
|-----------------|---------------------------------------------------------------------------------|--------------------|--------------|---------------------------------------|
| Itga1           | Integrin alpha 1                                                                | 109700             | -0.728006555 | 0.006150825                           |
| Ccnd1           | Cyclin D1                                                                       | 12443              | -1.077605284 | 5.75037E-10                           |
| Col3a1          | Collagen, type III, alpha 1                                                     | 12825              | -0.743337828 | 0.000466877                           |
| Fgf1            | Fibroblast growth factor 1                                                      | 14164              | -0.628052346 | 0.001128397                           |
| Fgf9            | Fibroblast growth factor 9                                                      | 14180              | -1.050785867 | 0.001042764                           |
| Nr4a1           | Nuclear receptor subfamily 4, group A, member 1                                 | 15370              | -0.677572388 | 7.10318E-05                           |
| Ibsp            | Integrin binding sialoprotein                                                   | 15891              | 1.878069263  | 0.003601267                           |
| Lamc2           | Laminin, gamma 2                                                                | 16782              | -1.318804613 | 0.002132823                           |
| Pck1            | Phosphoenolpyruvate carboxykinase 1, cytosolic                                  | 18534              | -1.093810094 | 1.51391E-05                           |
| Spp1            | Secreted phosphoprotein 1                                                       | 20750              | -2.46086461  | 1.20796E-07                           |
| Ppp2r2b         | Protein phosphatase 2 (formerly 2A), regulatory subunit B (PR 52), beta isoform | 72930              | -0.634139583 | 0.00632641                            |

B, mmu04261:Adrenergic signaling in cardiomyocytes; Q-value: 3.48218E-01

| Gene_<br>symbol | Description                                                                     | Entrez_<br>gene_id | log2 (ratio) | P-value<br>(differentially expressed) |
|-----------------|---------------------------------------------------------------------------------|--------------------|--------------|---------------------------------------|
| Actc1           | Actin, alpha, cardiac muscle 1                                                  | 11464              | -1.516723299 | 4.35213E-10                           |
| Fxyd2           | FXFD domain-containing ion transport regulator 2                                | 11936              | 0.66693585   | 0.0202254                             |
| Myl4            | Myosin, light polypeptide 4                                                     | 17896              | -1.665745408 | 1.14711E-09                           |
| Pln             | Phospholamban                                                                   | 18821              | 0.587228275  | 0.03414515                            |
| Tpm1            | Tropomyosin 1, alpha                                                            | 22003              | -0.745899579 | 2.23722E-05                           |
| Ppp2r2b         | Protein phosphatase 2 (formerly 2A), regulatory subunit B (PR 52), beta isoform | 72930              | -0.634139583 | 0.00632641                            |
| Calmod4         | Calmodulin 4                                                                    | 80796              | -1.192588809 | 0.038304966                           |

C, mmu04010:MAPK signaling pathway; Q-value: 2.51979E-01

| Gene_<br>symbol | Description                                     | Entrez_<br>gene_id | log2 (ratio) | P-value<br>(differentially expressed) |
|-----------------|-------------------------------------------------|--------------------|--------------|---------------------------------------|
| Fgf1            | Fibroblast growth factor 1                      | 14164              | -0.628052346 | 0.001128397                           |
| Fgf9            | Fibroblast growth factor 9                      | 14180              | -1.050785867 | 0.001042764                           |
| Fos             | FBJ osteosarcoma oncogene                       | 14281              | 2.097754447  | 4.30274E-16                           |
| Nr4a1           | Nuclear receptor subfamily 4, group A, member 1 | 15370              | -0.677572388 | 7.10318E-05                           |
| Il1r2           | Interleukin 1 receptor, type II                 | 16178              | -0.730935456 | 0.002586799                           |
| Dusp8           | Dual specificity phosphatase 8                  | 18218              | -0.623904643 | 0.009681475                           |
| Dusp1           | Dual specificity phosphatase 1                  | 19252              | 0.717123898  | 2.76778E-05                           |
| Tgfb3           | Transforming growth factor, beta 3              | 21809              | -0.927684244 | 8.6092E-07                            |
| Flnc            | Filamin C, gamma                                | 68794              | -0.604439776 | 0.029953726                           |

D, mmu04510:Focal adhesion; Q-value: 2.30786E-01

| Gene_<br>symbol | Description                   | Entrez_<br>gene_id | log2 (ratio) | P-value<br>(differentially expressed) |
|-----------------|-------------------------------|--------------------|--------------|---------------------------------------|
| Itga1           | Integrin alpha 1              | 109700             | -0.728006555 | 0.006150825                           |
| Ccnd1           | Cyclin D1                     | 12443              | -1.077605284 | 5.75037E-10                           |
| Col3a1          | Collagen, type III, alpha 1   | 12825              | -0.743337828 | 0.000466877                           |
| Ibsp            | Integrin binding sialoprotein | 15891              | 1.878069263  | 0.003601267                           |
| Lamc2           | Laminin, gamma 2              | 16782              | -1.318804613 | 0.002132823                           |

Table SII. Continued.

D, mmu04510:Focal adhesion; Q-value: 2.30786E-01

| Gene_<br>symbol | Description                             | Entrez_<br>gene_id | log2 (ratio) | P-value<br>(differentially expressed) |
|-----------------|-----------------------------------------|--------------------|--------------|---------------------------------------|
| Myl7            | Myosin, light polypeptide 7, regulatory | 17898              | -2.005796219 | 1.33911E-07                           |
| Spp1            | Secreted phosphoprotein 1               | 20750              | -2.46086461  | 1.20796E-07                           |
| Flnc            | Filamin C, gamma                        | 68794              | -0.604439776 | 0.029953726                           |

E, mmu05414:Dilated cardiomyopathy; Q-value: 3.28022E-01

| Gene_<br>symbol | Description                        | Entrez_<br>gene_id | log2 (ratio) | P-value<br>(differentially expressed) |
|-----------------|------------------------------------|--------------------|--------------|---------------------------------------|
| Itga1           | Integrin alpha 1                   | 109700             | -0.728006555 | 0.006150825                           |
| Actc1           | Actin, alpha, cardiac muscle 1     | 11464              | -1.516723299 | 4.35213E-10                           |
| Pln             | Phospholamban                      | 18821              | 0.587228275  | 0.03414515                            |
| Tgfb3           | Transforming growth factor, beta 3 | 21809              | -0.927684244 | 8.6092E-07                            |
| Tpm1            | Tropomyosin 1, alpha               | 22003              | -0.745899579 | 2.23722E-05                           |

F, mmu04512:ECM-receptor interaction; Q-value: 3.32824E-01

| Gene_<br>symbol | Description                   | Entrez_<br>gene_id | log2 (ratio) | P-value<br>(differentially expressed) |
|-----------------|-------------------------------|--------------------|--------------|---------------------------------------|
| Itga1           | Integrin alpha 1              | 109700             | -0.728006555 | 0.006150825                           |
| Col3a1          | Collagen, type III, alpha 1   | 12825              | -0.743337828 | 0.000466877                           |
| Ibsp            | Integrin binding sialoprotein | 15891              | 1.878069263  | 0.003601267                           |
| Lamc2           | Laminin, gamma 2              | 16782              | -1.318804613 | 0.002132823                           |
| Spp1            | Secreted phosphoprotein 1     | 20750              | -2.46086461  | 1.20796E-07                           |

G, mmu04390:Hippo signaling pathway; Q-value: 4.17219E-01

| Gene_<br>symbol | Description                                                                     | Entrez_<br>gene_id | log2 (ratio) | P-value<br>(differentially expressed) |
|-----------------|---------------------------------------------------------------------------------|--------------------|--------------|---------------------------------------|
| Ccnd1           | Cyclin D1                                                                       | 12443              | -1.077605284 | 5.75037E-10                           |
| Fgf1            | Fibroblast growth factor 1                                                      | 14164              | -0.628052346 | 0.001128397                           |
| Ctgf            | Connective tissue growth factor                                                 | 14219              | -1.162100608 | 8.65714E-07                           |
| Jub             | Ajuba LIM protein                                                               | 16475              | -0.706416327 | 0.021084402                           |
| Tgfb3           | Transforming growth factor, beta 3                                              | 21809              | -0.927684244 | 8.6092E-07                            |
| Ppp2r2b         | Protein phosphatase 2 (formerly 2A), regulatory subunit B (PR 52), beta isoform | 72930              | -0.634139583 | 0.00632641                            |

H, mmu04964:Proximal tubule bicarbonate reclamation; Q-value: 3.91079E-01

| Gene_<br>symbol | Description                                      | Entrez_<br>gene_id | log2 (ratio) | P-value<br>(differentially expressed) |
|-----------------|--------------------------------------------------|--------------------|--------------|---------------------------------------|
| Fxyd2           | FXYP domain-containing ion transport regulator 2 | 11936              | 0.66693585   | 0.0202254                             |
| Gls             | Glutaminase                                      | 14660              | -0.627068474 | 0.005879942                           |
| Pck1            | Phosphoenolpyruvate carboxykinase 1, cytosolic   | 18534              | -1.093810094 | 1.51391E-05                           |

I, mmu05031:Amphetamine addiction; Q-value: 4.86761E-01

| Gene_<br>symbol | Description                                        | Entrez_<br>gene_id | log2 (ratio) | P-value<br>(differentially expressed) |
|-----------------|----------------------------------------------------|--------------------|--------------|---------------------------------------|
| Arc             | Activity regulated cytoskeletal-associated protein | 11838              | -1.050307792 | 0.000123996                           |

Table SII. Continued.

I, mmu05031:Amphetamine addiction; Q-value: 4.86761E-01

| Gene_<br>symbol | Description                 | Entrez_<br>gene_id | log2 (ratio) | P-value<br>(differentially expressed) |
|-----------------|-----------------------------|--------------------|--------------|---------------------------------------|
| Fos             | FBJ osteosarcoma oncogene   | 14281              | 2.097754447  | 4.30274E-16                           |
| Fosb            | FBJ osteosarcoma oncogene B | 14282              | 2.265185031  | 2.34224E-06                           |
| Calm4           | Calmodulin 4                | 80796              | -1.192588809 | 0.038304966                           |

J, mmu04152:AMPK signaling pathway; Q-value: 5.53642E-01

| Gene_<br>symbol | Description                                                                     | Entrez_<br>gene_id | log2 (ratio) | P-value<br>(differentially expressed) |
|-----------------|---------------------------------------------------------------------------------|--------------------|--------------|---------------------------------------|
| Adipoq          | Adiponectin, C1Q and collagen domain containing                                 | 11450              | -0.604428986 | 0.001522034                           |
| Ccna2           | Cyclin A2                                                                       | 12428              | -1.395203322 | 6.49299E-05                           |
| Ccnd1           | Cyclin D1                                                                       | 12443              | -1.077605284 | 5.75037E-10                           |
| Pck1            | Phosphoenolpyruvate carboxykinase 1, cytosolic                                  | 18534              | -1.093810094 | 1.51391E-05                           |
| Ppp2r2b         | Protein phosphatase 2 (formerly 2A), regulatory subunit B (PR 52), beta isoform | 72930              | -0.634139583 | 0.00632641                            |

K, mmu04260:Cardiac muscle contraction; Q-value: 5.41416E-01

| Gene_<br>symbol | Description                                      | Entrez_<br>gene_id | log2 (ratio) | P-value<br>(differentially expressed) |
|-----------------|--------------------------------------------------|--------------------|--------------|---------------------------------------|
| Actc1           | Actin, alpha, cardiac muscle 1                   | 11464              | -1.516723299 | 4.35213E-10                           |
| Fxyd2           | FXYD domain-containing ion transport regulator 2 | 11936              | 0.66693585   | 0.0202254                             |
| Myl4            | Myosin, light polypeptide 4                      | 17896              | -1.665745408 | 1.14711E-09                           |
| Tpm1            | Tropomyosin 1, alpha                             | 22003              | -0.745899579 | 2.23722E-05                           |

L, mmu05410:Hypertrophic cardiomyopathy (HCM); Q-value: 5.335E-01

| Gene_<br>symbol | Description                        | Entrez_<br>gene_id | log2 (ratio) | P-value<br>(differentially expressed) |
|-----------------|------------------------------------|--------------------|--------------|---------------------------------------|
| Itga1           | Integrin alpha 1                   | 109700             | -0.728006555 | 0.006150825                           |
| Actc1           | Actin, alpha, cardiac muscle 1     | 11464              | -1.516723299 | 4.35213E-10                           |
| Tgfb3           | Transforming growth factor, beta 3 | 21809              | -0.927684244 | 8.6092E-07                            |
| Tpm1            | Tropomyosin 1, alpha               | 22003              | -0.745899579 | 2.23722E-05                           |
